# Supplementary material for: Prognostic Value of SYNTAX Score II in Patients with Acute Coronary Syndromes Referred for Invasive Management: A Subanalysis from the SPUM and COMFORTABLE AMI Cohorts
Source: Hindawi journal article supplement (doi:10.1155/2018/9762176), 2018-09-25
Supplement: f1 [file 9762176.f1.pdf]

**Supplementary Figure 1. Spline curve representation of different cutoffs of SxSII score and their respective hazard for the outcome of all-cause mortality.**

Above the median cutoff, (SxSII=25), there is a persistent increase in hazard for death at one year along with a significant improvement in the 95% confidence interval.

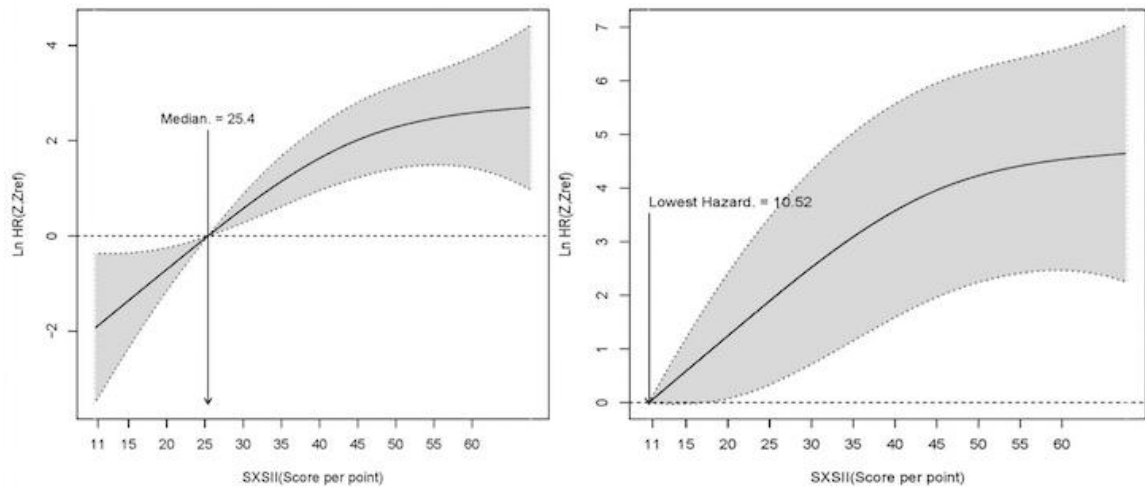

| SXSII Score | Log Hazard | Lower 95% CI | Higher 95% CI |
|-------------|------------|--------------|---------------|
| 11          | 0.06320911 | -0.006925241 | 0.1333435     |
| 15          | 0.58927967 | -0.022237634 | 1.2007970     |
| 20          | 1.24445200 | 0.075598028  | 2.4133060     |
| 25          | 1.89463487 | 0.334068806  | 3.4552009     |
| 30          | 2.52056494 | 0.714365918  | 4.3267640     |
| 35          | 3.09028874 | 1.150103045  | 5.0304744     |
| 40          | 3.57660744 | 1.586886446  | 5.5663284     |
| 50          | 4.23265088 | 2.242573451  | 6.2227283     |
| 60          | 4.53298374 | 2.466540845  | 6.5994266     |

### Supplementary Figure 2. ROC curves

Receiver-operating characteristic (ROC) curves for SYNTAX II, and anatomical SYNTAX in predicting 1-year MACE (Entire population of 734 patients). No significant difference between S<sub>x</sub>SII (Red line) and S<sub>x</sub>S in prediction of 1-year MACE. AUC = area under curve; CI = confidence interval(s).

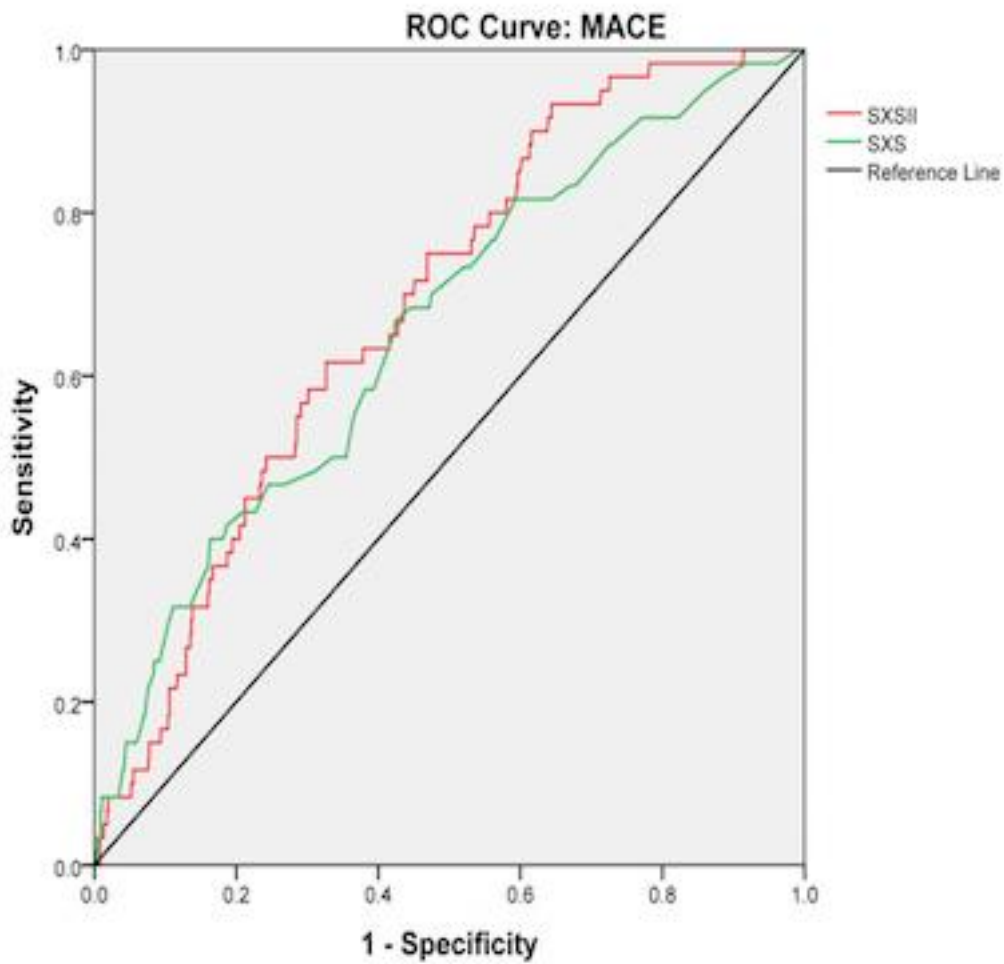

**Supplementary Figures 3 and 4. Univariable predictors of studied outcomes.**

Shown here are different variables found to be significant in a univariable analysis for the primary and secondary outcomes.

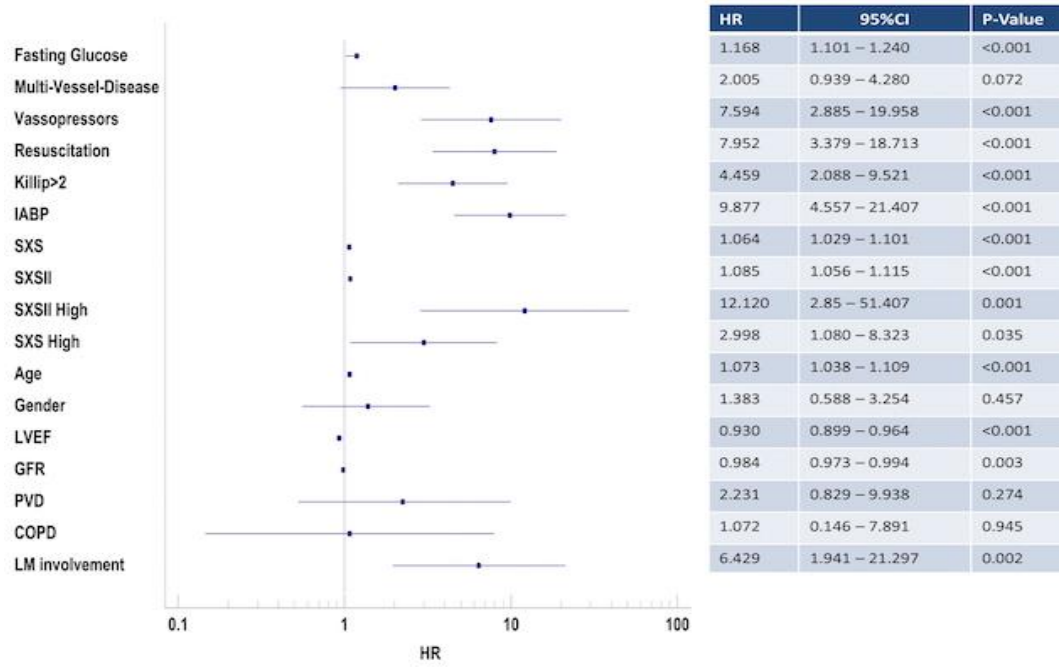

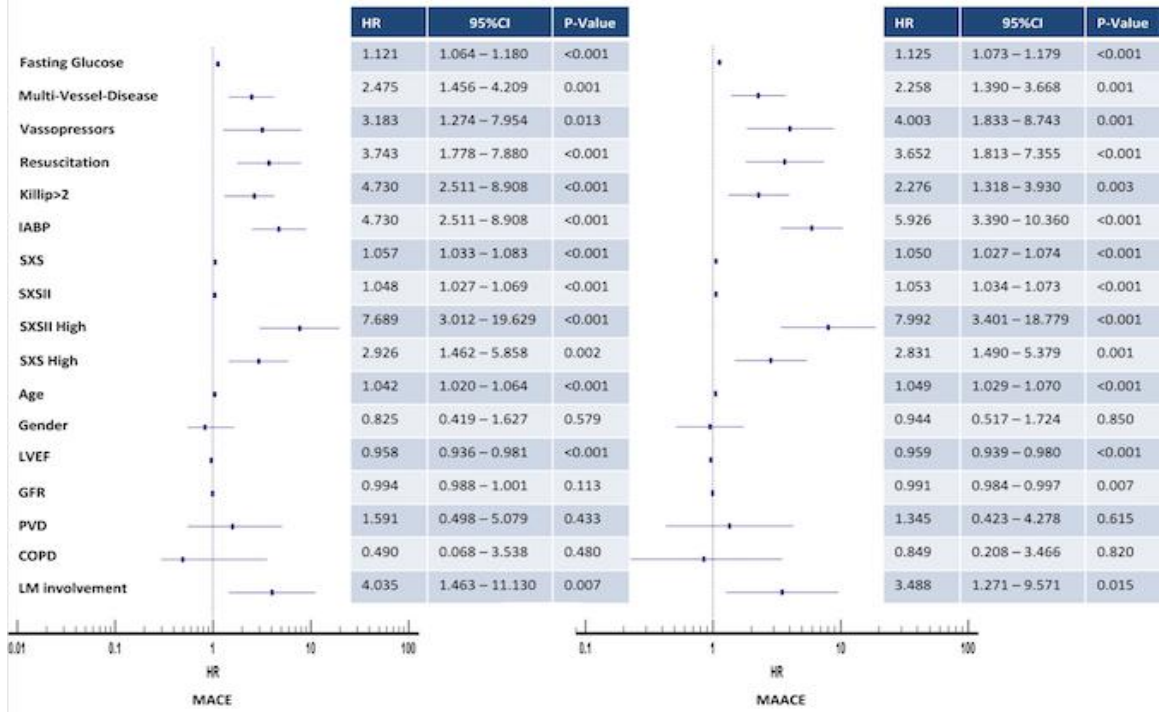

**Supplementary Table 1. Clinical Outcomes at 1-year stratified by tertiles of Anatomical SYNTAX Score**

| <b>Outcomes at one year</b>         | <b>SxS<sub>low</sub> ≤12</b><br>N=251 | <b>SxS<sub>Mid</sub> 12-22</b><br>N=244 | <b>SxS<sub>High</sub> ≥22</b><br>N=239 | <b>P-value</b> | <b>N=734</b> |
|-------------------------------------|---------------------------------------|-----------------------------------------|----------------------------------------|----------------|--------------|
| All-cause Mortality                 | 5 (2.0)                               | 9 (3.7)                                 | 14 (5.9)                               | 0.09           | 28 (3.8)     |
| Cardiovascular Death                | 3 (1.2)                               | 7 (2.9)                                 | 11 (4.6)                               | 0.07           | 21 (2.8)     |
| Non-Cardiovascular Death            | 2 (0.8)                               | 2 (0.8)                                 | 3 (1.3)                                | 1              | 7 (0.9)      |
| Cerebrovascular Event               | 1 (0.4)                               | 1 (0.4)                                 | 2 (0.8)                                | 0.699          | 4 (0.5)      |
| Myocardial Infarction               | 6(2.4)                                | 2 (0.8)                                 | 12 (5.0)                               | 0.017          | 20 (2.7)     |
| Target Vessel Revascularization     | 8 (3.2)                               | 8 (3.3)                                 | 12 (5.0)                               | 0.498          | 28 (3.8)     |
| Clinically Driven Revascularization | 8 (3.2)                               | 14 (5.7)                                | 19 (7.9)                               | 0.065          | 41 (5.6)     |
| Any Revascularization               | 9(3.6)                                | 15(6.1)                                 | 19 (7.9)                               | 0.12           | 43 5.8)      |
| MACE                                | 11 (4.4)                              | 20 (8.2)                                | 29 (12.1)                              | 0.007          | 60 (7.4)     |
| MACCE                               | 13 (5.2)                              | 24 (9.8)                                | 33 (13.8)                              | 0.005          | 70 (9.5)     |

MACE, major adverse Cardiac events; MACCE, major adverse cardiac and cerebrovascular events

**Supplementary Table 2. Multivariable predictors of MACE and MACCE at one year.**

| Variables in SXSII model                                              | MACE              |         | MACCE               |         |
|-----------------------------------------------------------------------|-------------------|---------|---------------------|---------|
|                                                                       | HR [95% CI]       | P value | HR [95% CI]         | P value |
| SXSII                                                                 | 1.055 [1.03-1.08] | <0.001  | 1.065 [1.04-1.094]  | <0.001  |
| MVD                                                                   | 1.837 [1.04-3.25] | 0.037   | 1.714 [0.853-3.441] | 0.130   |
| Fasting Glucose                                                       | 1.067 [1.01-1.13] | 0.032   | 1.055 [0.99-1.19]   | 0.075   |
| Resuscitation                                                         | 3.571 [1.67-7.64] | <0.001  | 5.07 [2.41-10.65]   | <0.001  |
| Gender (Female)                                                       | 0.329 [0.14-0.80] | 0.012   | 0.314 [0.127-0.773] | 0.012   |
| H&L Test: $X^2$ :7,df:8,p:0.45(MACE), $X^2$ :4.067,df:8,p:0.85(MACCE) |                   |         |                     |         |

| Variables in SXS Model                                                   | MACE                |         | MACCE               |         |
|--------------------------------------------------------------------------|---------------------|---------|---------------------|---------|
|                                                                          | HR [95% CI]         | P value | HR [95% CI]         | P value |
| Age                                                                      | 1.064 [1.03-1.11]   | <0.0001 | 1.058 [1.03-1.08]   | <0.001  |
| GFR                                                                      | 1.011 [1.01-1.02]   | 0.011   | 1.007 [0.997-1.016] | 0.178   |
| LVEF                                                                     | 0.956 [0.93-0.98]   | <0.001  | 0.962 [0.94-0.98]   | 0.004   |
| MVD                                                                      | 2.432 [1.37-4.29]   | 0.002   | 2.325 [1.18-4.58]   | 0.015   |
| Resuscitation                                                            | 5.55 [2.43-12.68]   | <0.0001 | 8.12 [3.64-18.10]   | <0.001  |
| Fasting Glucose                                                          | 1.07 [1.01-1.15]    | 0.022   | 1.06 [0.99-1.13]    | 0.059   |
| SXS                                                                      | 1.017 [0.982-1.053] | 0.343   | 1.006 [0.972-1.040] | 0.746   |
| H&L Test: $X^2$ :4.181,df:8,p:0.8(MACE), $X^2$ :3.91,df:8,p:0.865(MACCE) |                     |         |                     |         |

**Supplementary Table 3. GRACE versus SxSII score in prediction of 1-year All-cause mortality**

| <b>Variables</b>                  | <b>HR [95% CI]</b> | <b>All-Cause Mortality</b> |
|-----------------------------------|--------------------|----------------------------|
|                                   |                    | <b>P value</b>             |
| GRACE Score (per point increment) | 1.010 [0.98-1.03]  | 0.379                      |
| SxSII (per point increment)       | 1.061 [1.01-1.11]  | 0.014                      |

  

| <b>Variables</b>                    | <b>HR [95% CI]</b>  | <b>All-Cause Mortality</b> |
|-------------------------------------|---------------------|----------------------------|
|                                     |                     | <b>P value</b>             |
| GRACE score (per point increment)   | 1.00 [0.97 - 1.022] | 0.615                      |
| SxSII <sub>High</sub> (SXSII ≥30.6) | 16.3 [1.90 - 140.3] | 0.01                       |
